# Supplementary material
Source: publisher site journal article supplement (https://www.dovepress.com/article/469247)
Supplement: Supplementary file 1 [file get_supplementary_file.php]

**Prognostic value and immunological role of POP7 in clear cell renal cell carcinoma**

Ning Lou 1#, Xiangui Meng 2#, Tiexi Yu2#, Weiquan Li2#, Xin Lv3#, Weiwei Han1, Wen Xiao2*, Ying Shi2*

1 Department of Urology, The Central Hospital of Wuhan, Tongji Medical College, Huazhong University of Science and Technology, Wuhan, China.

2 Department of Urology, Union Hospital, Tongji Medical College, Huazhong University of Science and Technology, Wuhan 430022, China

3 Department of Urology, Central Hospital of Hefeng County, Enshi 445800, China

# These authors contribute equally to this study.

**Running head:** The role of POP7 in clear cell renal cell carcinoma

*Correspondence to:*

Wen Xiao, Department of Urology, Union Hospital, Tongji Medical College, Huazhong University of Science and Technology, 1277 Jiefang Avenue, Wuhan, Hubei Province, 430022(China). Phone: 86-17088353610; FAX number: 85776343; Email: [xiaowenx11@163.com](mailto:xiaowenx11@163.com).

Ying Shi, Department of Urology, Union Hospital, Tongji Medical College, Huazhong University of Science and Technology, Wuhan, 430022, China; E-mail: yingshi_whxh@hust.edu.cn

.


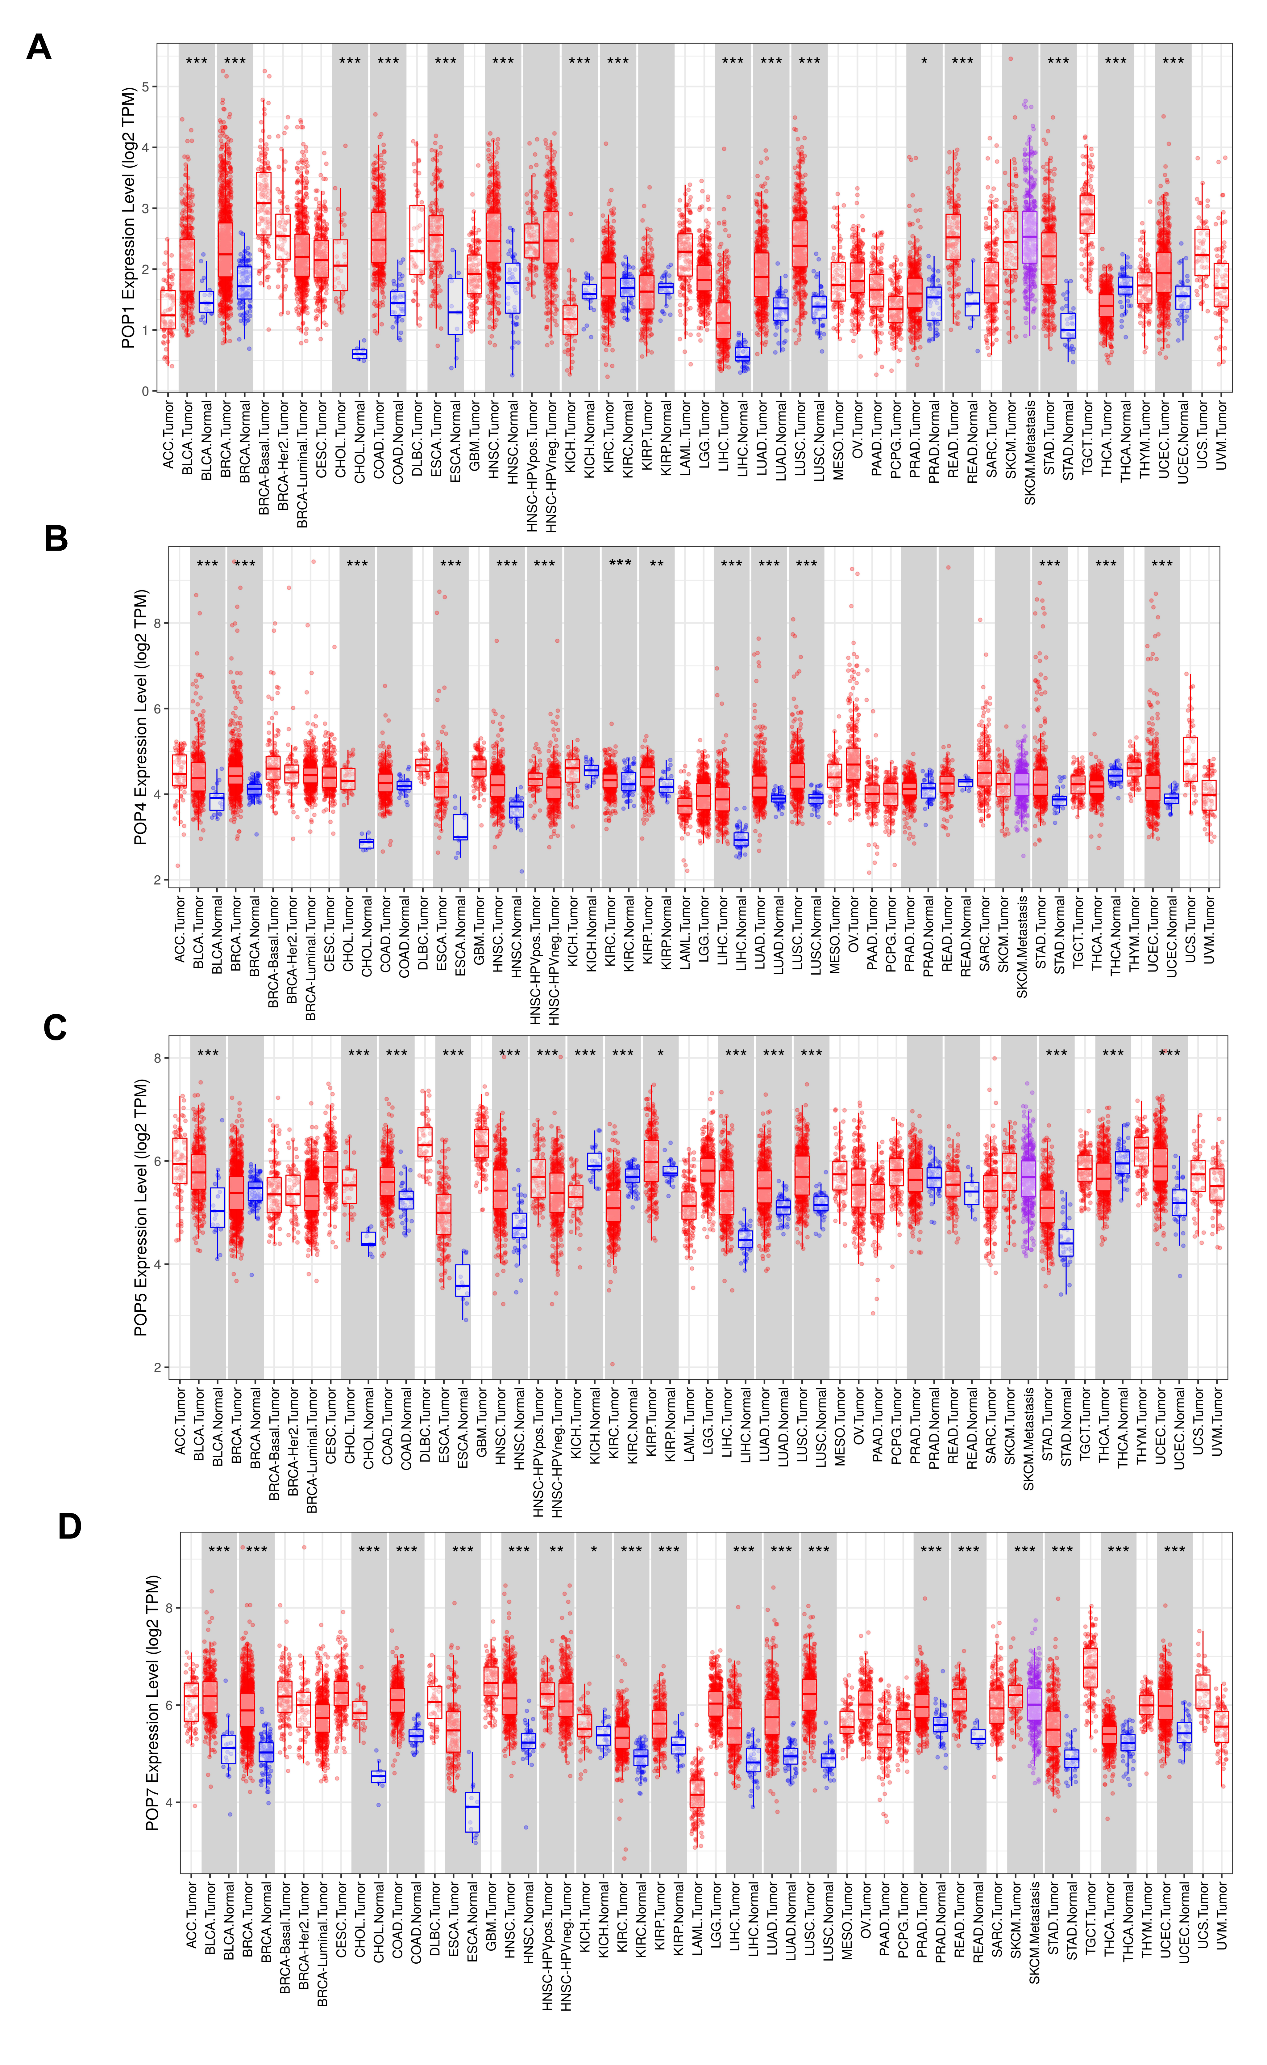


Supplementary Figure 1. POP family expression in pan-cancer (A) Heat map depicting POP1 expression in TCGA-pan cancer. (B) Heat map depicting POP4 expression in TCGA-pan cancer. (C) Heat map depicting POP5 expression in TCGA-pan cancer. (D) Heat map depicting POP7 expression in TCGA-pan cancer. Bladder urothelial carcinoma (BLCA), breast invasive carcinoma (BRCA), cholangiocarcinoma (CHOL), colon adenocarcinoma (COAD), esophageal carcinoma (ESCA), head and neck squamous cell carcinoma (HNSC), kidney chromophobe (KICH), kidney renal papillary cell carcinoma (KIRP), kidney clear cell carcinoma (KIRC), liver hepatocellular carcinoma (LIHC), lung adenocarcinoma (LUAD), lung squamous cell carcinoma (LUSC), prostate adenocarcinoma (PRAD), thyroid carcinoma (THCA),rectum adenocarcinoma (READ), stomach adenocarcinoma (STAD), uterine corpus endometrial carcinoma (UCEC), *p < 0.05, ** p <0.01,*** p <0.001.
